# Supplementary material for: Multigenerational hybridisation results in heterosis and facilitates adaptive introgression, with no evidence of outbreeding depression in a pair of marine gastropods
Source: Research Square preprint supplement (doi:10.21203/rs.3.rs-3996311/v1), 2024-03-08
Supplement: Supplementary file 1 [file 309d0de1ad994094257b7b5d.docx]

Supplementary material

**Table S1**: Quasibinomial generalised linear model relationships between growth rate and measures of admixture, observed heterozygosity and the frequency of homozygous *B. auratum* and *B. vittatum* alleles from two samples of the hybrid population in Fremantle.

| **Source** | **d.f.** | **chisq** | ***P*** |
| --- | --- | --- | --- |
| Admixture coefficient |  |  |  |
| 2007 | 1 | 4.278 | **0.039** |
| 2020 | 1 | 1.814 | 0.178 |
| Admixture x haplotype |  |  |  |
| 2007 | 1 | 0.399 | 0.528 |
| 2020 | 1 | 0.718 | 0.397 |
|  |  |  |  |
| Observed heterozygosity |  |  |  |
| 2007 | 1 | 6.165 | **0.013** |
| 2020 | 1 | 0.458 | 0.498 |
| Heterozygosity x haplotype |  |  |  |
| 2007 | 1 | 0.001 | 0.980 |
| 2020 | 5 | 0.993 | 0.319 |
|  |  |  |  |
| Frequency homozygous reference allele | |  |  |
| 2007 | 1 | 6.724 | **0.010** |
| 2020 | 1 | 3.580 | 0.058 |
| Frequency homozygous reference x haplotype | | |  |
| 2007 | 1 | 0.370 | 0.543 |
| 2020 | 1 | 0.453 | 0.501 |
|  |  |  |  |
| Frequency homozygous alternative allele | |  |  |
| 2007 | 1 | 0.010 | 0.919 |
| 2020 | 1 | 0.012 | 0.914 |
| Frequency homozygous alternative x haplotype | | |  |
| 2007 | 1 | 0.007 | 0.935 |
| 2020 | 1 | 0.755 | 0.385 |

| **Locus** |  | **Reference species** | **Matching region** | **Percentage coverage** | **Percentage identity** | **E-value** | **Accession** |
| --- | --- | --- | --- | --- | --- | --- | --- |
| *B. vittatum* |  |  |  |  |  |  |  |
| locus 64 |  | *Conus consors* | Genome assembly contig | 100 | 89.86 | 7x10-18 | [SDAX011006299.1](https://www.ncbi.nlm.nih.gov/nuccore/SDAX011006299) |
| locus 323 |  | *Colubraria reticulata* | Genome assembly contig | 100 | 84.06 | 6x10-14 | [CVMW01055328.1](https://www.ncbi.nlm.nih.gov/nuccore/CVMW01055328) |
| locus 339 |  | *Pomacea canuliculata* | Zinc transporter ZIP3-like, transcript variant X4-1 | 98 | 86.76 | 5x10-12 | [XM_025222517.1](https://www.ncbi.nlm.nih.gov/nucleotide/XM_025222517.1?report=genbank&log$=nucltop&blast_rank=1&RID=2U18M66T016) |
| *Colubraria reticulata* |  | *Pomacea canuliculata* | Ectoine dioxygenase-like mRNA | 96 | 79.45 | 1x10-25 | [XM_025256943.1](https://www.ncbi.nlm.nih.gov/nucleotide/XM_025256943.1?report=genbank&log$=nucltop&blast_rank=1&RID=2U18M66T016) |
|  |  |  |  |  |  |  |  |
| *B. auratum* |  |  |  |  |  |  |  |
| locus 2 |  | *Pomacea canuliculata* | Predicted: neuroglobin-like transcript variant X3-1, mRNA | 100 | 86.96 | 2x10-12 | [XM_025249863.1](https://www.ncbi.nlm.nih.gov/nucleotide/XM_025249863.1?report=genbank&log$=nucltop&blast_rank=1&RID=2X4S827D013) |
|  |  | *Haliotis rufescens* | Predicted: cytoglobin-2-like, transcript variant X2-1, mRNA | 100 | 86.96 | 2x10-12 | [XM_046514951.2](https://www.ncbi.nlm.nih.gov/nucleotide/XM_046514951.2?report=genbank&log$=nucltop&blast_rank=4&RID=2X4S827D013) |
|  |  | *Pomacea canuliculata* | Genome assembly | 100 | 86.96 | 2x10-15 | [SRJH01000008.1](https://www.ncbi.nlm.nih.gov/nuccore/SRJH01000008) |
| locus 11 |  | *Conus consors* | Genome assembly | 96 | 91.94 | 7x10-17 | [SDAX010073324.1](https://www.ncbi.nlm.nih.gov/nuccore/SDAX010073324) |
| locus 46 |  | *Pomacea canuliculata* | Predicted: metabotropic glutamate receptor-like, mRNA | 100 | 86.96 | 3x10-15 | [XM_025246620.1](https://www.ncbi.nlm.nih.gov/nucleotide/XM_025246620.1?report=genbank&log$=nucltop&blast_rank=1&RID=2X4S827D013) |
|  |  | *Anisus vortex* | Genome assembly | 92 | 90 | 5x10-12 | [OX421508.1](https://www.ncbi.nlm.nih.gov/nucleotide/OX421508.1?report=genbank&log$=nucltop&blast_rank=3&RID=2X4S827D013) |
| locus 77 |  | *Conus tribblei* | Genome assembly | 97 | 83.58 | 2x10-11 | [LFLW010467922.1](https://www.ncbi.nlm.nih.gov/nuccore/LFLW010467922) |
| *Phymorhynchus buccinoides* |  | *Pomacea canuliculata* | Predicted: G protein-activated inward rectifier potassium channel 4-like mRNA | 68 | 75 | 3x10-8 | [XM_025233462.1](https://www.ncbi.nlm.nih.gov/nucleotide/XM_025233462.1?report=genbank&log$=nucltop&blast_rank=1&RID=31W12WG801N) |

**Table S2**: Sequence matches to annotated genomic regions of outlier loci identified from *B. vittatum* and *B. auratum*.
